# Supplementary material for: Whole genome resequencing and custom genotyping unveil clonal lineages in ‘Malbec’ grapevines (Vitis vinifera L.)
Source: PubMed Central journal article supplement (PMC8032709; doi:10.1038/s41598-021-87445-y), 2021-04-08
Supplement: 41598_2021_87445_MOESM1_ESM.pdf [file 41598_2021_87445_MOESM1_ESM.pdf]

# Whole genome resequencing and custom genotyping unveil clonal lineages in 'Malbec' grapevines (*Vitis vinifera* L.)

Luciano Calderón, Nuria Mauri, Claudio Muñoz, Pablo Carbonell-Bejerano, Laura Bree, Daniel Bergamin, Cristobal Sola, Sebastian Gomez-Talquenca, Carolina Royo, Javier Ibáñez, José Miguel Martínez-Zapater & Diego Lijavetzky

## Supplementary figures

**Figure S1.** Variants and effect type distribution across the genome for clonal genetic variations (941 SNVs) and for variants distinguishing Malbec from PN40024 (2.1 million SNPs), as provided by SNPeff.

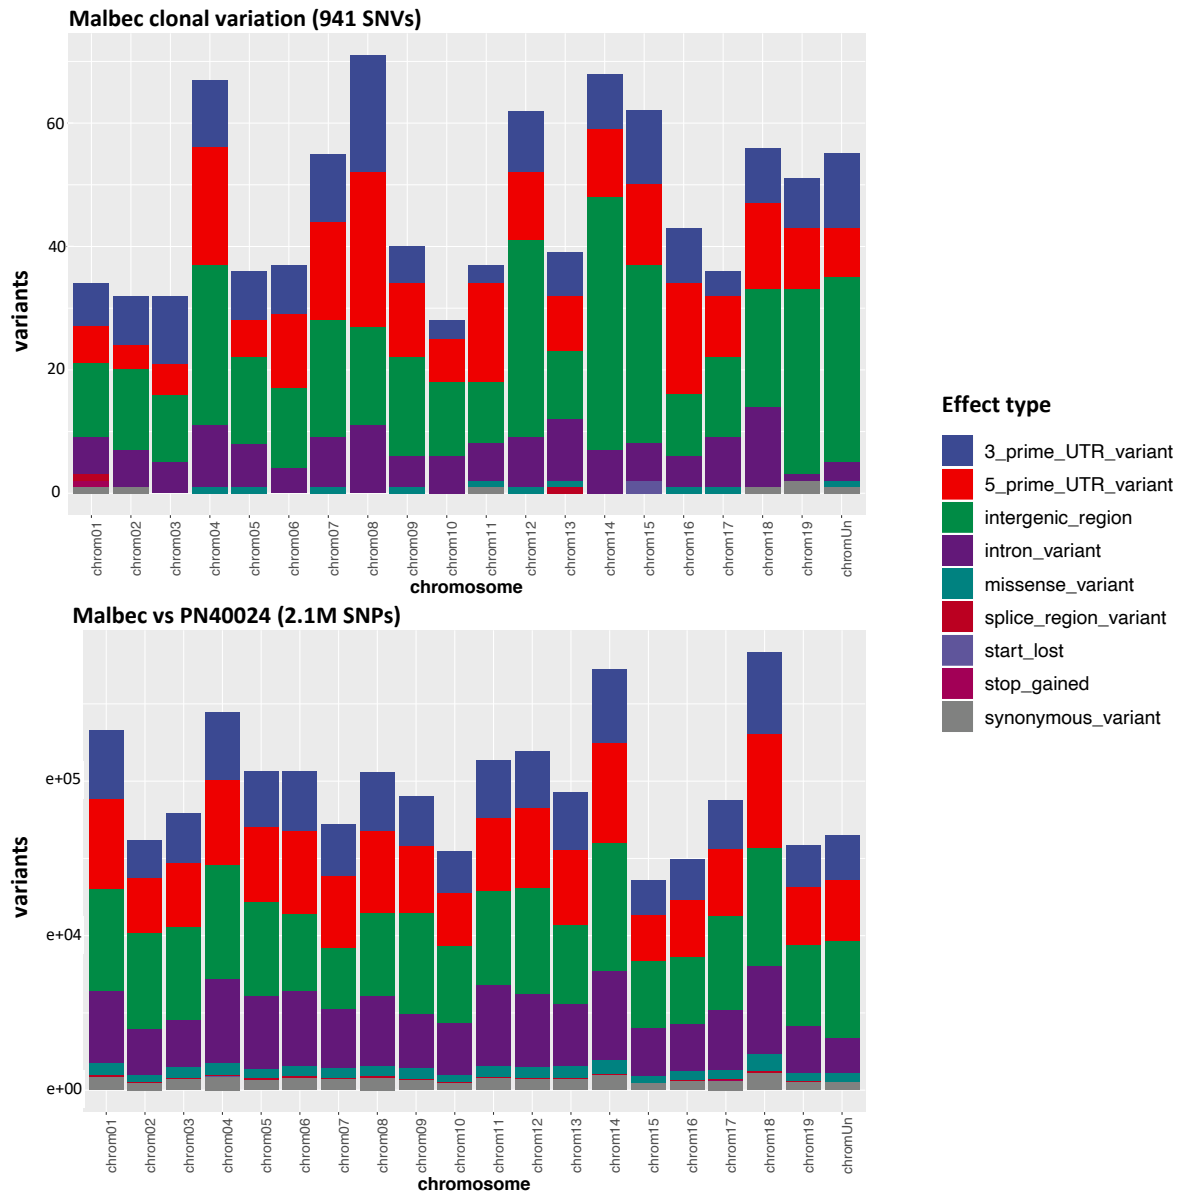

**Figure S2.** Example of four SC-SNVs validated through Sanger sequencing, one for each of the four re-sequenced clones. Electropherograms show that the position of interest (indicated with the blue line) is heterozygous alternative for the expected clone (on top) and homozygous as the reference in the other three.

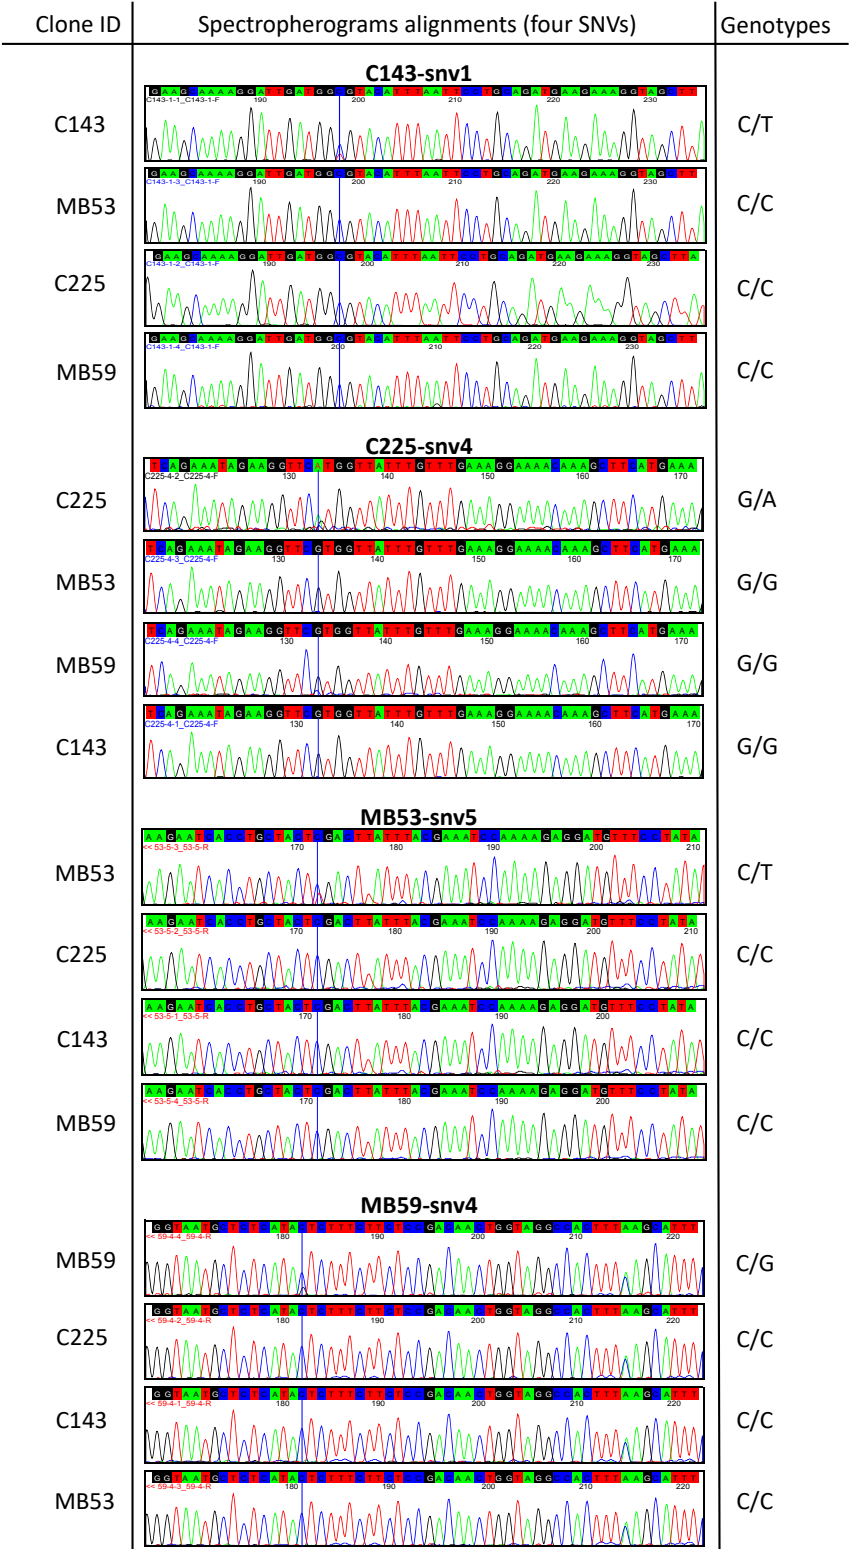

**Figure S3.** Median joining network based on the 22 SNVs that showed more than two samples with the alternative allele. We recovered the main nine groups of genotypes than the analysis using the 41 SNVs, but only two singleton genotypes: C225 and MB59.

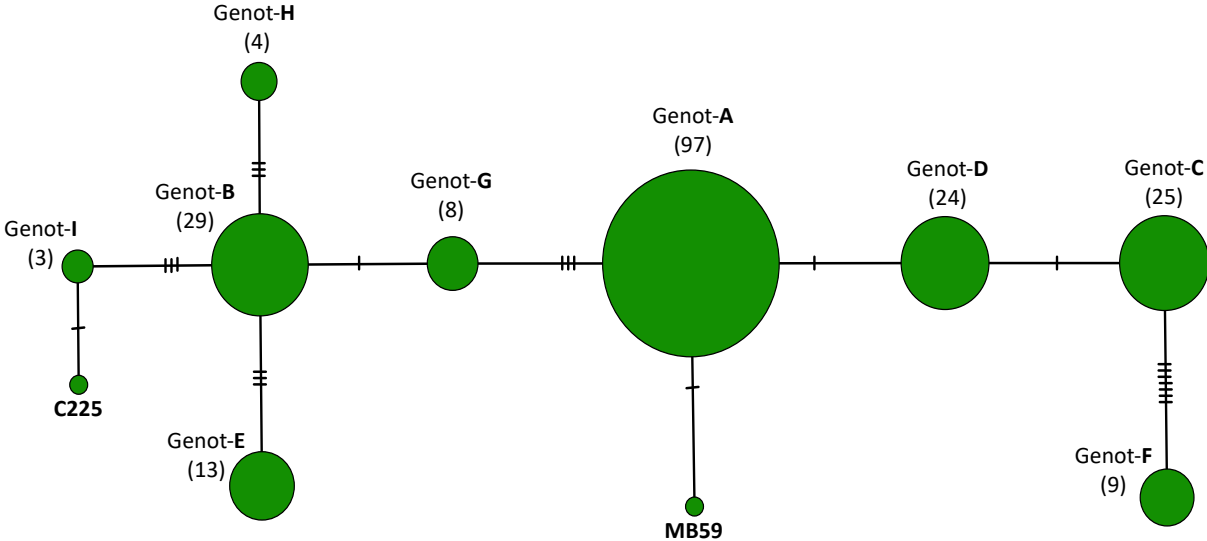

**Figure S4.** Principal coordinates analysis based only on the four shared SNV (Sh-SNV). PCoA recovers the distinction between the two clonal lineages (Groups Ar and Fr).

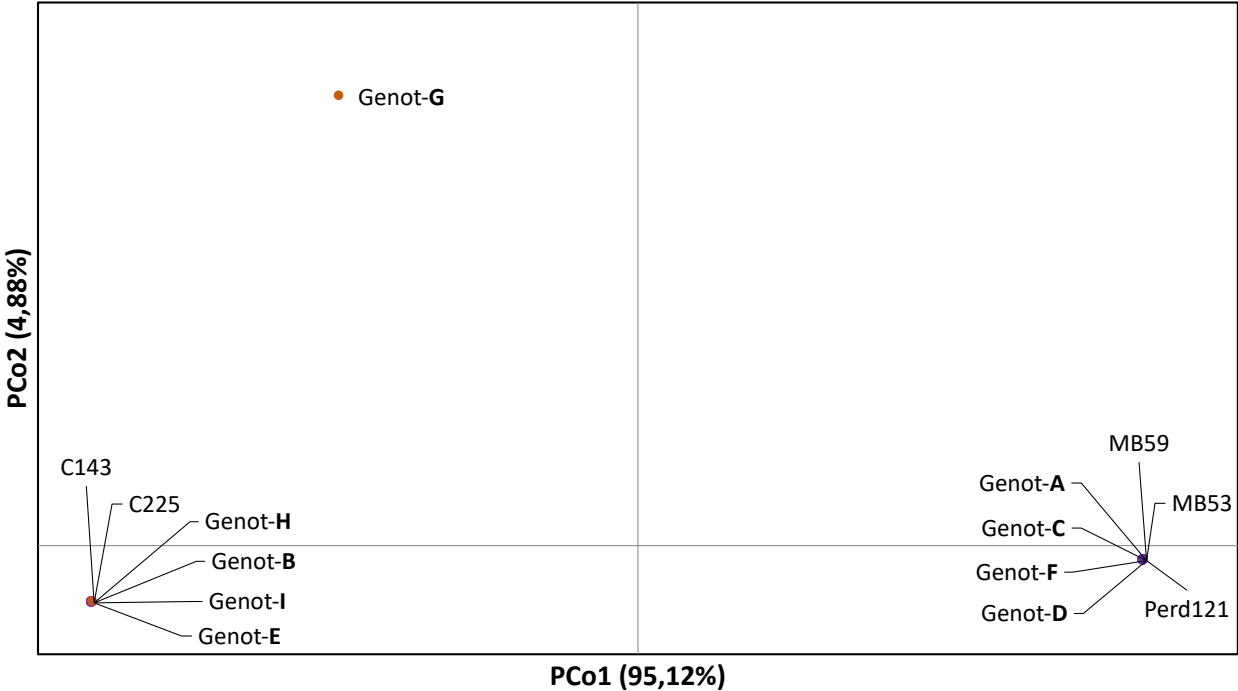

## Supplementary Tables

**Table S1.** Raw data of paired-end (PE) reads obtained for each resequenced clone. Alignment stats values reported after filtering, percentage and coverage of reads alignment to *Vitis vinifera* L. reference genome (PN40024).

| Clone ID | Raw data          |            |                     | Alignment stats |                      |
|----------|-------------------|------------|---------------------|-----------------|----------------------|
|          | PE reads obtained | Reads size | Total sequence (Gb) | Covered %       | Depth coverage (+SD) |
| C143     | 86,859,172        | 125        | 10.85               | 77.55           | 28.47 (70.66)        |
| C225     | 94,388,045        | 125        | 11.79               | 77.9            | 30.26 (59.52)        |
| MB53     | 90,054,921        | 125        | 11.25               | 78.01           | 31.29 (48.7)         |
| MB59     | 90,125,307        | 125        | 11.26               | 77.94           | 29.96 (40.61)        |

**Table S2.** Genomic context of variants occurrence for each of the resequenced clones and for SNPs shared by the four clones. Variants occurring in intergenic, intronic and exonic regions, and the transitions (Tr) to transversions (Tv) ratio for those regions are shown.

| IDs               | Counts     |         |         | Tr/Tv ratio |        |      |
|-------------------|------------|---------|---------|-------------|--------|------|
|                   | Intergenic | Intron  | Exon    | Intergenic  | Intron | Exon |
| C143              | 451        | 133     | 11      | 2.55        | 2.26   | 10   |
| C225              | 439        | 116     | 8       | 2.54        | 2.25   | 7    |
| MB53              | 440        | 117     | 8       | 2.64        | 2.07   | 7    |
| MB59              | 447        | 140     | 10      | 2.73        | 2.06   | 4    |
| Malbec vs PN40024 | 1,179,296  | 607,119 | 134,727 | 2.39        | 1.86   | 2    |

**Table S5.** Details of the 41 SNVs employed in the final analyses. The name of the SNV refers to the re-sequenced clone for which it was identified. Genomic position is relative to PN40024, as well as the reference allele (Ref) state. The alternative allele (Alt) was observed in that position only for one of the four clones. Finally, the genotypic frequencies for each SNV based on the 214 successfully genotyped samples.

| SNVs-ID    | Genomic position | Allelic state |     | Genotypic frequencies |    |    |
|------------|------------------|---------------|-----|-----------------------|----|----|
|            |                  | Ref           | Alt | XX                    | XY | YY |
| C143-snv1  | chr10:2146290    | C             | T   | 213                   | 1  | 0  |
| C143-snv2  | chr10:2250888    | C             | T   | 201                   | 13 | 0  |
| C143-snv3  | chr11:2533840    | T             | C   | 213                   | 1  | 0  |
| C143-snv4  | chr12:5997741    | T             | C   | 213                   | 1  | 0  |
| C143-snv6  | chr14:12612349   | C             | G   | 201                   | 13 | 0  |
| C143-snv7  | chr16:18527058   | T             | C   | 213                   | 1  | 0  |
| C143-snv11 | chr7:5723085     | G             | A   | 201                   | 13 | 0  |
| C143-snv13 | chrUn:8135037    | C             | T   | 213                   | 1  | 0  |
| C143-snv14 | chrUn:30681019   | G             | A   | 213                   | 1  | 0  |
| C225-snv1  | chr11:13104147   | G             | A   | 213                   | 1  | 0  |
| C225-snv4  | chr15:1260006    | G             | A   | 209                   | 1  | 4  |
| C225-snv6  | chr18:18692633   | T             | C   | 213                   | 1  | 0  |
| C225-snv8  | chr19:15624611   | G             | T   | 213                   | 1  | 0  |
| C225-snv9  | chr4:17654346    | G             | A   | 210                   | 4  | 0  |
| C225-snv11 | chr6:10576840    | G             | A   | 210                   | 4  | 0  |

|                |                |   |   |     |     |   |
|----------------|----------------|---|---|-----|-----|---|
| C225-snv15     | chrUn:1879577  | C | T | 210 | 4   | 0 |
| MB53-snv1      | chr1:8947277   | G | A | 205 | 9   | 0 |
| MB53-snv2      | chr12:11248831 | C | T | 213 | 1   | 0 |
| MB53-snv3      | chr17:8192917  | G | A | 213 | 1   | 0 |
| MB53-snv4      | chr17:14078937 | G | A | 180 | 34  | 0 |
| MB53-snv5      | chr18:2701946  | C | T | 205 | 9   | 0 |
| MB53-snv6      | chr19:9264852  | C | T | 205 | 9   | 0 |
| MB53-snv7      | chr4:18276730  | A | C | 180 | 34  | 0 |
| MB53-snv8      | chr6:16432984  | A | G | 205 | 9   | 0 |
| MB53-snv9      | chr7:10631864  | C | T | 205 | 9   | 0 |
| MB53-snv10     | chr7:16870565  | C | G | 205 | 9   | 0 |
| MB53-snv11     | chrUn:1602277  | G | A | 205 | 9   | 0 |
| MB59-snv1      | chr1:4231365   | G | A | 213 | 1   | 0 |
| MB59-snv2      | chr10:9009503  | C | A | 209 | 5   | 0 |
| MB59-snv4      | chr14:612099   | C | G | 213 | 1   | 0 |
| MB59-snv5      | chr14:25250166 | C | T | 213 | 1   | 0 |
| MB59-snv9      | chr17:8058225  | C | G | 212 | 2   | 0 |
| MB59-snv10     | chr18:9067411  | T | C | 213 | 1   | 0 |
| MB59-snv11     | chr19:15786950 | C | T | 213 | 1   | 0 |
| MB59-snv12     | chr4:8993951   | A | G | 213 | 1   | 0 |
| MB59-snv14     | chr9:5534019   | T | C | 213 | 1   | 0 |
| MB59-snv15     | chr9:18487093  | T | C | 213 | 1   | 0 |
| MB53-MB59-snv2 | chr17:161911   | C | T | 50  | 164 | 0 |
| MB53-MB59-snv3 | chr19:22916577 | C | T | 58  | 156 | 0 |
| MB53-MB59-snv5 | chr5:22788880  | C | G | 58  | 156 | 0 |
| MB53-MB59-snv6 | chrUn:14723119 | C | T | 58  | 156 | 0 |

**Table S8.** Brief description of the five sampled ‘Malbec’ mass selections. Information provided by Mercier Argentina nursery.

| Mass selection ID | Vineyard origin                                                            | Plants selection criteria                                                                                                     | Selection outcome                                                                                                                                           |
|-------------------|----------------------------------------------------------------------------|-------------------------------------------------------------------------------------------------------------------------------|-------------------------------------------------------------------------------------------------------------------------------------------------------------|
| Perdriel          | District: Perdriel<br>Department: Luján de Cuyo<br>Province: Mendoza       | Absence of virus and fungus.<br>Absence of <i>millerandage</i> .<br>Loose cluster, medium size grape, red rachis at maturity. | Average Productivity: 155 qq/Ha<br>Average cluster weight: 120 gr<br>Average total polyphenols index (IPT) = 60.                                            |
| Vista Flores      | District: Vista Flores<br>Department: Tunuyán<br>Province: Mendoza         | Absence of virus and fungus.<br>The complete vineyard was preserved because of high quality wines production.                 | Average productivity: 170 qq/Ha<br>Average cluster weight: 190 gr<br>Average total polyphenols index (IPT) = 87.                                            |
| Las Compuertas    | District: Las Compuertas<br>Department: Luján de Cuyo<br>Province: Mendoza | Absence of virus and fungus.<br>Absence of <i>millerandage</i> .<br>Low productivity and high-quality wine production.        | Average productivity: 110 qq/Ha<br>Average cluster weight: 90 gr<br>Average total polyphenols index (IPT) = 50.                                             |
| Las Paredes       | District: Las Paredes<br>Department: San Rafael<br>Province: Mendoza       | Absence of virus and fungus.<br>Medium size grape and cluster, red rachis at maturity.                                        | Average productivity: 193 qq/Ha<br>Average cluster weight: 110 gr<br>Average total polyphenols index (IPT) = 45.                                            |
| Cobos             | District: Agrelo<br>Department: Lujan de Cuyo<br>Province: Mendoza         | Absence of virus and fungus.<br>Grapes skin showing intense purple coloration.                                                | Highly variable productivity: ranging between 160 and 317 qq/Ha.<br>Average cluster weight: 150 gr<br>Average total polyphenols index (IPT) = Not Available |
